# Supplementary material for: Lignosulfonates as Fire Retardants in Wood Flour-Based Particleboards
Source: Hindawi journal article supplement (doi:10.1155/2019/6178163), 2019-07-11
Supplement: f1 [file 6178163.f1.docx]

Supplementary Material

**Lignosulfonates** **as Fire Retardants in Wood Flour-Based Particleboards**

Stefania Angelinia,*, Aitor Barriob, Pierfrancesco Cerrutic, Gennaro Scarinzia, Javier Garcia-Jacab, Davide Savyd, Alessandro Piccolod, Mario Malinconicoa

a Institute for Polymers, Composites and Biomaterials, Via Campi Flegrei 34, Pozzuoli (Naples) 80078, Italy

b Tecnalia Research & Innovation, Area Anardi 5, Azpeitia (Guipùzcoa), E-20730, Spain

c Institute for Polymers, Composites and Biomaterials (IPCB-CNR), via Previati 1/E, 23900 Lecco, Italy.

d Interdepartmental Research Centre of Nuclear Magnetic Resonance for the Environment, Food Processing and New Materials (CERMANU), Via Università 100, Portici 80055, Italy

Correspondence to: Stefania Angelini (E-mail: gennaro.scarinzi@ipcb.cnr.it)

Pages S1-S9

**Characterization of Lignosulfonates**

**Morphological analysis of lignosulfonates:** Morphological characterization of CaLS was performed by means of Scanning Electron Microscopy (SEM) using a FEI Quanta 200 FEG device. The samples were mounted onto stubs by means of carbon adhesive tape and coated with a 20 nm thick gold/palladium layer by means of an Emitech K575X high vacuum coating system.

The calcium lignosulfonate (CaLS) used in this work was characterized through SEM and its morphology along with chemical structure are illustrated in Figure S1.







**Figure S1.** SEM micrograph and chemical structure of calcium lignosulfonates. Scale bar is 20 m

As shown in Figure S1, CaLS is characterized by spherical and hollow particles. The latter exhibit a wide size distribution, with diameters from 17 to 90 m.

**Chemical analysis of lignosulfonates:** The chemical composition of CaLS was investigated through 13C CP MAS-NMR analysis. Resonance assignments are listed in Table S1.

**Table S1.** Signal assignment in 13C CP MAS-NMR spectra of CaLS and LD.

| ****  **(ppm)** | **Material** | **Assignment** |
| --- | --- | --- |
| 177 | CaLS | Carbonyl groups on lignin Corhemicelluloses |
| 147 | CaLS, LD | Etherified C4 G units;  Non etherified C3 and C5 S units |
| 125 | CaLS, LD | C6 G units |
| 115 | CaLS, LD | C5 G units |
| 94 | CaLS | C4 hemicelluloses |
| 72 | CaLS | C2, C3 hemicelluloses  C-SO3H |
| 65 | CaLS, LD | C5 hemicelluloses  Cα,γ in β-O-4 linkages |
| 56 | CaLS, LD | Methoxy groups |

**
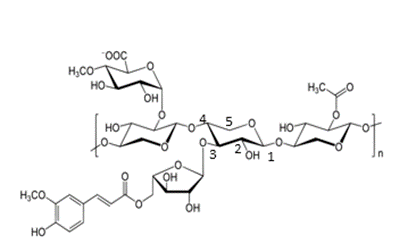
**

***Lignin Monomers*** *G = Guaiacyl; S= Syringyl* ***Hemicellulose-type Structure***

The weak peak at 177 ppm can be attributed to carbonyl carbons located on the Cγ of lignin aliphatic chain [1]. This signal can also be due to the acetyl carbons of hemicelluloses. However, this assignment is not supported by the presence of any signal relative to methyl carbons in the up-field region of the spectrum. The characteristic signals of lignin aromatic carbons are located between 110 and 160 ppm. In this spectral range, the resonance at 147 ppm can be attributed to etherified C4 in guaiacyl units (G) and non etherified C3 and C5 of syringyl (S) units. At higher fields, the peak at 125 ppm arise from C6 in G units while the resonance at 115 ppm originates from the C5 of the same moiety [2, 3, 4]. In addition to these aromatic signals, lignin also exhibits a distinctive peak in the aliphatic portion of the spectrum, centred at 56 ppm, and attributed to carbons of methoxy functionalities [5]. The other resonances detected in the aliphatic range of the spectrum are mostly generated from the carbohydrate fraction of the material, in particular from hemicelluloses. The signal at 72 ppm could be attributed to C2, C3, C5 of hemicelluloses units contained in raw lignosulfonates [6]. For this resonance, a contribution from the C linked to sulfonic acid group of LS cannot be excluded [1]. In this range, the NMR plot in Figure 1a shows two further signals at 94 and 65 ppm, attributed to C4 and C5 of xylopyranosic ring [6]. These assignments are in agreement with the typical structure of hemicelluloses, which are characterized by a linear chain composed of -D-xylopyranose units, that can be acetylated, and of arabinofuranose or xylofuranose branching [7]. Moreover, the 65 ppm resonance can be also due to Cα,γ in β-O-4 linkages of LD [4].

The results of HPLC analysis on dialysate before and after hydrolysis areshown in Table S2.

**Table S2.** Chemical composition of the dialysate. Concentrations are expressed in [µg mL-1].

| **Sample** | **Arabinose** | **XMG** | **Glucose** | **Total** |
| --- | --- | --- | --- | --- |
| **Dialysate before hydrolysis** | 4.3 | 97.7 | 9.9 | 111.9 |
| **Dialysate after hydrolysis** | 5.7 | 94.1 | 10.7 | 110.5 |
| *XMG= xylose/mannose/galactose* |  | | | |

**Characterization of WFP**

**Morphological analysis of WFP:** SEM analysis of the fracture surfaces obtained after the flexural tests are reported in Fig. S2. All the studied samples show irregular surfaces where large particles and fibres aggregates are visible. No detectable difference between plain and modified WFP can be envisaged.

**Figure S2**. SEM micrographs of the fracture surface of WFP after failure in the flexural tests.

**UV spectroscopy of LD.** Ionization difference ultraviolet spectroscopy was employed to estimate the content of free phenolic hydroxyl groups. The analysis was performed using a UV/Vis/NIR JASCO V-570 spectrophotometer, according to the method described in literature (8). This technique is based on the effect of ionization of phenolic hydroxyl groups on the spectroscopic properties of the lignin materials. Ionization of phenolic hydroxyl functionalities, in alkaline environment, produces a bathochromic shift and a hyperchromic effect on the UV spectrum of the material. These features can allow a quantitative determination of the phenolic hydroxyl groups and a qualitative evaluation of their structure.

Neutral and alkalized solutions of LD were prepared using water as solvent. First, a lignin stock solution was prepared at the concentration of 500 mg/L. The neutral solution was obtained by diluting 10 fold a suitable aliquot of the starting solution. The alkalized sample was prepared diluting the same aliquot of starting solution 10 fold with water/NaOH 0.001M, adjusting the pH to 11.2. The solutions were transferred in a 1-cm path quartz cuvette (1.45 mL capacity) and the UV light absorptions in the 200-700 nm range were recorded, against water for the neutral solution, and against water/NaOH 0.001 M, in the case of alkalized sample. The quantitative analysis of the non-etherified phenolic groups was performed by comparing the results of ionization absorbance difference to model compounds. The content of phenolic lignin moieties, expressed as wt% of OH groups with respect to the sample weight, is calculated by means of the following equations:[1]

(1)

where

(2)

and

(3)

Where ∆D is the specific difference absorptivity between neutral and ionized species [L/(g cm)]; ΔA is the ionization difference absorbance; c is the concentration (g/L); l is the light pathway (cm); Δε is the molar difference absorptivity between neutral and ionized species [L/(mol cm)]; ν is the wave number (cm-1); 17 is the molecular weight of OH units (g/mol).

**Figure S3. Ultraviolet spectra and ionization difference spectrum of LD in water.**

**Fire Behavior of WFP.** The fire behaviour of the particleboard modified with 15% APP (WF85-APP15) was also studied. This sample, during the fire experiment expanded and did not show ignition. It exhibited a *HRRmax* of 53.6 kW m-2 and a *THR* equal to 23.8 MJ m-2. With respect to WF100 a remarkable reduction of both parameters was detected. A similar effect, but of a lower extent, was recorded for mass loss as it showed a *ML* value of 77.8% which is 13% lower than WF100. With regard to smoke emission, WF85-APP15 was characterized by the largest smoke production with a *TSP* of 4.00 m2 and *SEA* equal to 158 m2 kg-1. Both values are much larger if compared to WF100. A similar effect was recorded in a PP/wood composite modified with APP as fire retardant [9].

**References**

(1) Feng-Bing L, Yan-Lei S, Chong-Pin H, Ying-Xia L, Biao-Hua C. Synthesis of Novel Lignin-Based Ion-Exchange Resin and Its Utilization in Heavy Metals Removal. Ind Eng Chem Res 2013; 52: 1267−1274.

(2) Wikberg H, Maunu SL. Characterisation of thermally modified hard- and softwoods

by 13C CPMAS NMR. Carbohydr Polym 2004; 58: 461–466.

(3) Savy D, Piccolo A. Physical–chemical characteristics of lignins separated from biomasses for second-generation ethanol. Biomass and Bioen 2014; 62: 58-67.

(4) Shukry N, Fadel SM, Agblevor FA, El-Kalyoubi SF. Some Physical Properties of Acetosolv Lignins from Bagasse. Journal of Applied Polymer Science 2008, 109:434–444

(5) Sannigrahi P, Kim DH, Jung S, Ragauskas A. Pseudo-lignin and pretreatment chemistry. Energy Environ Sci 2011;4: 1306-1310.

(6) Duchesne I, Hult E, Molin U, Daniel G, Iversen T, Lennholm H. The influence of hemicellulose on fibril aggregation of kraft pulp fibres as revealed by FE-SEM and CP/MAS 13C-NMR. Cellulose 2001; 8: 103-111.

(7) Wedig CL, Jaster EH, Moore KJ. Hemicellulose monosaccharide composition and in vitro disappearance of orchard grass and alfalfa hay. J Agric Food Chem 1987; 35: 214-218.

(8) Lin SY, Dence CW, in Methods in lignin chemistry, Springer Science & Business Media, 2012, 217-232.

(9) Nikolaeva M, Karki T. Reaction-to-Fire Properties of Wood–Polypropylene Composites Containing Different Fire Retardants. Fire Technology 2015; 51: 53–65.
